# Supplementary material
Source: ML conference proceedings conference paper supplement (https://openreview.net/forum?id=isEFziui9p)

**a**

Data and model

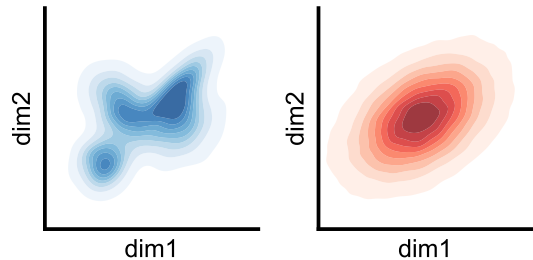**b**

Too little data

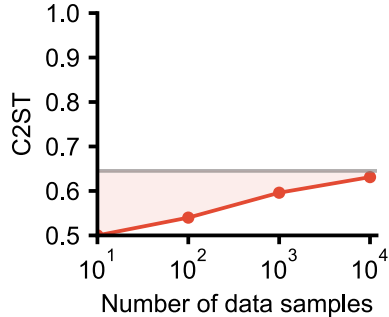**c**

Poor classifier

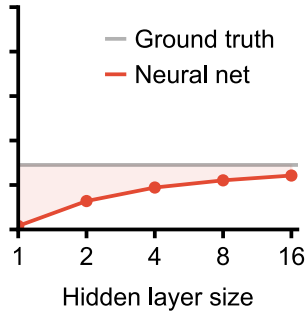

Supplement: supplementary_material [file attachment]

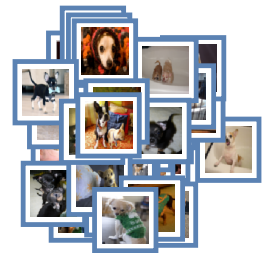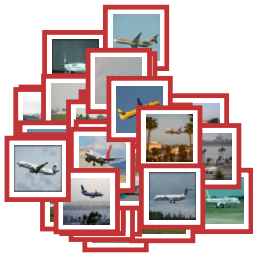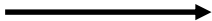

joint embedding  
function

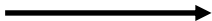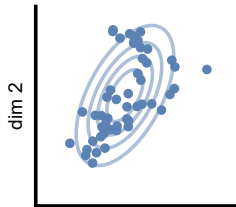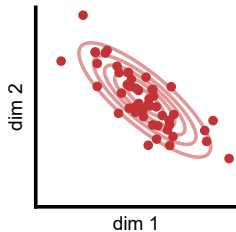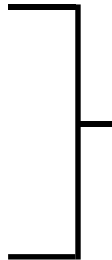

$$D( \text{dog distribution}, \text{airplane distribution} )$$

Supplement: supplementary_material [file attachment]

$p_{\text{true}}$

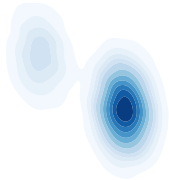

SW

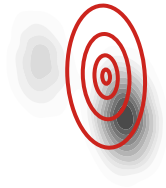

C2ST

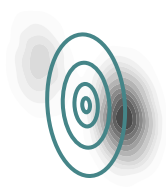

$\text{MMD}_1$

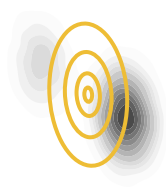

Supplement: supplementary_material [file attachment]
